# Supplementary material for: Heritability of Coronary Artery Disease: Insights From a Classical Twin Study
Source: PubMed Central journal article supplement (PMC8925867; doi:10.1161/circimaging.121.013348), 2022-02-24
Supplement: hci-15-e013348-s001.pdf [file hci-15-e013348-s001.pdf]

## SUPPLEMENTAL MATERIAL

This appendix has been provided by the authors to give readers additional information about their work.

### Supplement to: **Heritability of coronary artery disease: insights from a classical twin study**

Zsafia D. Drobni, MD, PhD<sup>a</sup>, Marton Kolossvary, MD, PhD<sup>a</sup>, Julia Karady, MD<sup>a</sup>, Adam L. Jermendy, MD, PhD<sup>a</sup>, Adam D. Tarnoki, MD, PhD<sup>b</sup>, David L. Tarnoki, MD, PhD<sup>b</sup>, Judit Simon, MD<sup>a</sup>, Balint Szilveszter, MD, PhD<sup>a</sup>, Levente Littvay, PhD<sup>c</sup>, Szilard Voros, MD, PhD<sup>d</sup>, Gyorgy Jermendy, MD, PhD<sup>c</sup>, Bela Merkely, MD, PhD<sup>a</sup>, Pal Maurovich-Horvat, MD, PhD, MPH<sup>a,b</sup>

<sup>a</sup>MTA-SE Cardiovascular Imaging Research Group, Heart and Vascular Center, Semmelweis University, Budapest, Hungary

<sup>b</sup>Department of Radiology, Medical Imaging Centre, Semmelweis University, Budapest, Hungary

<sup>c</sup>Department of Political Science, Central European University, Budapest, Hungary

<sup>d</sup>Global Genomics Group, Richmond, VA; United States of America

<sup>e</sup>Bajcsy-Zsilinszky Hospital, Budapest, Hungary

## Table of Contents

|                                                                                                                                                                                                        |          |
|--------------------------------------------------------------------------------------------------------------------------------------------------------------------------------------------------------|----------|
| <b>Document S1: Semiautomated plaque quantification and co-registration.....</b>                                                                                                                       | <b>3</b> |
| <b>Table S1: Detailed model information regarding single trait classical twin model of Calcium score (n = 196). The most parsimonious models are bolded. ....</b>                                      | <b>4</b> |
| <b>Table S2: Detailed model information regarding single trait classical twin model of Calcium score excluding the 0-0 pairs (n = 98). The most parsimonious models are bolded. ....</b>               | <b>5</b> |
| <b>Table S3: Detailed model information regarding single trait classical twin model of calcified plaque volume (n = 196). The most parsimonious models are bolded.....</b>                             | <b>6</b> |
| <b>Table S4: Detailed model information regarding single trait classical twin model of calcified plaque volume excluding the 0-0 pairs (n = 124). The most parsimonious models are bolded..</b>        | <b>7</b> |
| <b>Table S5: Detailed model information regarding single trait classical twin model of non-calcified plaque volume (n = 196). The most parsimonious models are bolded. ....</b>                        | <b>8</b> |
| <b>Table S6: Detailed model information regarding single trait classical twin model of non-calcified plaque volume excluding the 0-0 pairs (n = 124). The most parsimonious models are bolded.....</b> | <b>9</b> |

## **Document S1: Semiautomated plaque quantification and co-registration.**

First, automated segmentation of vessel and lumen border was performed for the main epicardial vessels and for the side branches, with  $\geq 2$  mm in luminal diameter. Data sets were evaluated for the presence of any coronary atherosclerotic plaques. Coronary atherosclerotic plaques were defined as follows: any visible structure that could be assigned to the coronary artery wall in at least two independent planes and had a computed tomography density below the contrast-enhanced coronary lumen but above the surrounding connective tissue. Tracings were manually corrected when necessary. In the second step, the proximal and distal edges of the plaques were marked manually using multiplanar coronary CTA images. In the third step, twin-pair-based co-registration was performed:<sup>17,23</sup>

- 1) If one of the twins had plaques but the other did not, then we matched the plaques in location (using the distance from the orifice or from bifurcations) and length from the diseased sibling to the healthy segment. Same length segments in the same location were analyzed for the healthy sibling as for the diseased one to adjust for vessel wall volume (Example 1 on Figure 1).
- 2) If both siblings had CAD, then all the plaques were analyzed for both siblings (Example 2 on Figure 1).
- 3) If none of the siblings had coronary plaque, then 0 was used.

**Table S1: Detailed model information regarding single trait classical twin model of Calcium score (n = 196). The most parsimonious models are bolded.**

| Adjusted for                                           | Estimated parameters | A*           | 95% CI             | C†    | 95% CI      | ‡E           | 95% CI             | Model -2LL    | df            | AIC           | Difference to full model -2LL | Difference to full model p |
|--------------------------------------------------------|----------------------|--------------|--------------------|-------|-------------|--------------|--------------------|---------------|---------------|---------------|-------------------------------|----------------------------|
| <b>Calcium score - raw data</b>                        |                      |              |                    |       |             |              |                    |               |               |               |                               |                            |
| Age Sex                                                | ACE                  | 49.75        | 43.49-74.01        | 0.00  | 0.00-29.66  | 50.25        | 28.23-56.56        | 508.87        | 190.00        | 128.87        |                               |                            |
|                                                        | <b>AE</b>            | <b>49.75</b> | <b>43.97-70.04</b> |       |             | <b>50.25</b> | <b>29.96-56.03</b> | <b>508.87</b> | <b>191.00</b> | <b>126.87</b> | <b>0.00</b>                   | <b>1.00</b>                |
|                                                        | CE                   |              |                    | 34.59 | 30.95-40.73 | 65.41        | 59.27-69.05        | 512.23        | 191.00        | 130.23        | 3.36                          | 0.07                       |
|                                                        | E                    |              |                    |       |             | 100          | 100-100            | 524.72        | 192.00        | 140.72        | 15.85                         | 0.00                       |
| ASCVD§ Statin Risk                                     | ACE                  | 40.82        | 13.66-62.76        | 3.05  | 0.00-23.38  | 56.13        | 38.62-66.73        | 509.07        | 190.00        | 129.07        |                               |                            |
|                                                        | <b>AE</b>            | <b>44.47</b> | <b>36.65-60.12</b> |       |             | <b>55.53</b> | <b>39.88-65.35</b> | <b>509.08</b> | <b>191.00</b> | <b>127.08</b> | <b>0.01</b>                   | <b>0.91</b>                |
|                                                        | CE                   |              |                    | 31.22 | 27.65-36.38 | 68.78        | 63.62-72.35        | 510.42        | 191.00        | 128.42        | 1.35                          | 0.25                       |
|                                                        | E                    |              |                    |       |             | 100          | 100-100            | 520.17        | 192.00        | 136.17        | 11.10                         | 0.00                       |
| <b>Calcium score - log transformed data</b>            |                      |              |                    |       |             |              |                    |               |               |               |                               |                            |
| Age Sex                                                | ACE                  | 75.59        | 69.52-81.46        |       |             | 24.41        | 18.54-30.48        | 441.81        | 190.00        | 61.81         |                               |                            |
|                                                        | <b>AE</b>            | <b>75.59</b> | <b>69.41-80.80</b> |       |             | <b>24.41</b> | <b>19.02-30.59</b> | <b>441.81</b> | <b>191.00</b> | <b>59.81</b>  | <b>0.00</b>                   | <b>1.00</b>                |
|                                                        | CE                   |              |                    | 45.94 | 39.32-52.52 | 54.06        | 47.48-60.68        | 463.13        | 191.00        | 81.13         | 21.33                         | 0.00                       |
|                                                        | E                    |              |                    |       |             | 100          | 100-100            | 486.36        | 192.00        | 102.36        | 44.56                         | 0.00                       |
| ASCVD§ Statin Risk                                     | ACE                  | 76.87        | 70.82-83.56        |       |             | 23.13        | 16.97-29.32        | 445.34        | 190.00        | 65.34         |                               |                            |
|                                                        | <b>AE</b>            | <b>76.87</b> | <b>70.05-82.01</b> |       |             | <b>23.13</b> | <b>17.99-29.95</b> | <b>445.34</b> | <b>191.00</b> | <b>63.34</b>  | <b>0.00</b>                   | <b>1.00</b>                |
|                                                        | CE                   |              |                    | 48.17 | 40.67-54.30 | 51.83        | 45.70-59.33        | 465.53        | 191.00        | 83.53         | 20.20                         | 0.00                       |
|                                                        | E                    |              |                    |       |             | 100          | 100-100            | 490.35        | 192.00        | 106.35        | 45.01                         | 0.00                       |
| <b>Calcium score - inverse normal transformed data</b> |                      |              |                    |       |             |              |                    |               |               |               |                               |                            |
| Age Sex                                                | ACE                  | 59.87        | 58.11-71.35        |       |             | 40.13        | 29.22-41.97        | 531.14        | 190.00        | 151.14        |                               |                            |
|                                                        | <b>AE</b>            | <b>59.87</b> | <b>56.75-69.15</b> |       |             | <b>40.13</b> | <b>30.85-43.25</b> | <b>531.14</b> | <b>191.00</b> | <b>149.14</b> | <b>0.00</b>                   | <b>1.00</b>                |
|                                                        | CE                   |              |                    | 36.48 | 32.25-45.52 | 63.52        | 54.48-67.75        | 541.02        | 191.00        | 159.02        | 9.88                          | 0.00                       |
|                                                        | E                    |              |                    |       |             | 100          | 100-100            | 555.01        | 192.00        | 171.01        | 23.87                         | 0.00                       |
| ASCVD§ Statin Risk                                     | ACE                  | 57.92        | 49.42-65.61        |       |             | 42.08        | 35.21-50.95        | 527.95        | 190.00        | 147.95        |                               |                            |
|                                                        | <b>AE</b>            | <b>57.92</b> | <b>50.25-65.73</b> |       |             | <b>42.08</b> | <b>34.27-49.75</b> | <b>527.95</b> | <b>191.00</b> | <b>145.95</b> | <b>0.00</b>                   | <b>1.00</b>                |
|                                                        | CE                   |              |                    | 34.63 | 27.44-41.76 | 65.37        | 58.24-72.56        | 537.07        | 191.00        | 155.07        | 9.12                          | 0.00                       |
|                                                        | E                    |              |                    |       |             | 100          | 100-100            | 548.89        | 192.00        | 164.89        | 20.94                         | 0.00                       |

\*A: additive genetic factor, †C: common environmental factor, ‡E: unique environmental factor, §ASCVD: Atherosclerotic Cardiovascular Disease

**Table S2: Detailed model information regarding single trait classical twin model of Calcium score excluding the 0-0 pairs (n = 98). The most parsimonious models are bolded.**

| Adjusted for                                           | Estimated parameters | A*           | 95% CI             | C†           | 95% CI             | ‡E           | 95% CI             | Model -2LL    | df           | AIC           | Difference to full model -2LL | Difference to full model p |
|--------------------------------------------------------|----------------------|--------------|--------------------|--------------|--------------------|--------------|--------------------|---------------|--------------|---------------|-------------------------------|----------------------------|
| <b>Calcium score - raw data</b>                        |                      |              |                    |              |                    |              |                    |               |              |               |                               |                            |
| Age Sex                                                | ACE                  | 27.93        | 12.45-52.33        | 5.96         | 0.00-17.41         | 66.11        | 50.0-73.1          | 262.06        | 92.00        | 274.06        |                               |                            |
|                                                        | <b>AE</b>            | <b>35.04</b> | <b>27.98-51.09</b> |              |                    | <b>64.96</b> | <b>48.91-72.02</b> | <b>262.08</b> | <b>93.00</b> | <b>272.08</b> | <b>0.02</b>                   | <b>0.88</b>                |
|                                                        | CE                   |              |                    | 26.05        | 22.49-33.55        | 73.95        | 66.45-77.51        | 262.35        | 93.00        | 272.35        | 0.29                          | 0.59                       |
|                                                        | E                    |              |                    |              |                    | 100          | 100-100            | 265.79        | 94.00        | 273.79        | 3.73                          | 0.15                       |
| ASCVD§ Statin Risk                                     | ACE                  | 9.22         | 0.00-44.79         | 19.10        | 12.09-29.35        | 71.68        | 59.78-79.75        | 263.47        | 92.00        | 275.47        |                               |                            |
|                                                        | AE                   | 32.90        | 25.6-47.58         |              |                    | 67.10        | 52.42-74.40        | 263.68        | 93.00        | 273.68        | 0.21                          | 0.64                       |
|                                                        | <b>CE</b>            |              |                    | <b>25.49</b> | <b>21.16-32.20</b> | <b>74.51</b> | <b>67.80-78.84</b> | <b>263.50</b> | <b>93.00</b> | <b>273.50</b> | <b>0.03</b>                   | <b>0.87</b>                |
|                                                        | E                    |              |                    |              |                    | 100          | 100-100            | 266.69        | 94.00        | 274.69        | 3.22                          | 0.20                       |
| <b>Calcium score - log transformed data</b>            |                      |              |                    |              |                    |              |                    |               |              |               |                               |                            |
| Age Sex                                                | ACE                  | 37.88        | 28.97-56.29        |              |                    | 62.12        | 43.71-71.03        | 257.05        | 92.00        | 269.05        |                               |                            |
|                                                        | <b>AE</b>            | <b>37.88</b> | <b>26.29-53.35</b> |              |                    | <b>62.12</b> | <b>46.65-73.71</b> | <b>257.05</b> | <b>93.00</b> | <b>267.05</b> | <b>0.00</b>                   | <b>1.00</b>                |
|                                                        | CE                   |              |                    | 12.97        | 6.09-23.88         | 87.03        | 76.12-93.91        | 259.91        | 93.00        | 269.91        | 2.86                          | 0.09                       |
|                                                        | E                    |              |                    |              |                    | 100          | 100-100            | 260.74        | 94.00        | 268.74        | 3.69                          | 0.16                       |
| ASCVD§ Statin Risk                                     | ACE                  | 45.44        | 35.37-60.70        |              |                    | 54.56        | 39.23-64.66        | 256.89        | 92.00        | 268.89        |                               |                            |
|                                                        | <b>AE</b>            | <b>45.44</b> | <b>35.94-60.58</b> |              |                    | <b>54.56</b> | <b>39.42-64.06</b> | <b>256.89</b> | <b>93.00</b> | <b>266.89</b> | <b>0.00</b>                   | <b>1.00</b>                |
|                                                        | CE                   |              |                    | 18.44        | 10.59-28.20        | 81.56        | 71.80-89.41        | 260.49        | 93.00        | 270.49        | 3.60                          | 0.06                       |
|                                                        | E                    |              |                    |              |                    | 100          | 100-100            | 262.16        | 94.00        | 270.16        | 5.27                          | 0.07                       |
| <b>Calcium score - inverse normal transformed data</b> |                      |              |                    |              |                    |              |                    |               |              |               |                               |                            |
| Age Sex                                                | ACE                  | 14.62        | 12.01-31.32        |              |                    | 85.38        | 69.13-88.25        | 276.50        | 92.00        | 288.50        |                               |                            |
|                                                        | AE                   | 14.62        | 12.20-30.65        |              |                    | 85.38        | 69.35-87.80        | 276.50        | 93.00        | 286.50        | 0.00                          | 1.00                       |
|                                                        | CE                   |              |                    | 5.55         | 3.22-17.27         | 94.45        | 82.73-96.78        | 276.95        | 93.00        | 286.95        | 0.45                          | 0.50                       |
|                                                        | <b>E</b>             |              |                    |              |                    | <b>100</b>   | <b>100-100</b>     | <b>277.10</b> | <b>94.00</b> | <b>285.10</b> | <b>0.60</b>                   | <b>0.74</b>                |
| ASCVD§ Statin Risk                                     | ACE                  | 12.83        | 6.23-27.25         | 0.00         | 0.00-23.73         | 87.17        | 74.27-94.45        | 275.13        | 92.00        | 287.13        |                               |                            |
|                                                        | AE                   | 12.83        | 3.55-24.66         |              |                    | 87.17        | 75.34-96.45        | 275.13        | 93.00        | 285.13        | 0.00                          | 1.00                       |
|                                                        | CE                   |              |                    | 4.14         | 0.00-14.77         | 95.86        | 85.23-100          | 275.50        | 93.00        | 285.50        | 0.37                          | 0.54                       |
|                                                        | <b>E</b>             |              |                    |              |                    | <b>100</b>   | <b>100-100</b>     | <b>275.58</b> | <b>94.00</b> | <b>283.58</b> | <b>0.45</b>                   | <b>0.80</b>                |

\*A: additive genetic factor, †C: common environmental factor, ‡E: unique environmental factor, §ASCVD: Atherosclerotic Cardiovascular Disease

**Table S3: Detailed model information regarding single trait classical twin model of calcified plaque volume (n = 196). The most parsimonious models are bolded.**

| Adjusted for                                                     | Estimated parameters | A*           | 95% CI             | C†           | 95% CI             | ‡E           | 95% CI             | Model -2LL    | df            | AIC           | Difference to full model -2LL | Difference to full model p |
|------------------------------------------------------------------|----------------------|--------------|--------------------|--------------|--------------------|--------------|--------------------|---------------|---------------|---------------|-------------------------------|----------------------------|
| <b>Calcified plaque volume - raw data</b>                        |                      |              |                    |              |                    |              |                    |               |               |               |                               |                            |
| Age Sex                                                          | ACE                  | 62.82        | 56.78-77.51        |              |                    | 37.18        | 22.49-43.22        | 491.06        | 190.00        | 111.06        |                               |                            |
|                                                                  | <b>AE</b>            | <b>62.82</b> | <b>58.86-78.11</b> |              |                    | <b>37.18</b> | <b>21.89-41.14</b> | <b>491.06</b> | <b>191.00</b> | <b>109.06</b> | <b>0.00</b>                   | <b>1.00</b>                |
|                                                                  | CE                   |              |                    | 43.35        | 40.03-49.02        | 56.65        | 50.98-59.97        | 498.02        | 191.00        | 116.02        | 6.96                          | 0.01                       |
|                                                                  | E                    |              |                    |              |                    | 100          | 100-100            | 518.42        | 192.00        | 134.42        | 27.35                         | 0.00                       |
| ASCVD§ Statin Risk                                               | ACE                  | 56.05        | 43.63-76.10        | 0.16         | 0.00-19.54         | 43.78        | 26.61-52.19        | 492.99        | 190.00        | 112.99        |                               |                            |
|                                                                  | <b>AE</b>            | <b>56.24</b> | <b>47.47-70.49</b> |              |                    | <b>43.76</b> | <b>29.51-52.53</b> | <b>492.99</b> | <b>191.00</b> | <b>110.99</b> | <b>0.00</b>                   | <b>0.99</b>                |
|                                                                  | CE                   |              |                    | 39.22        | 35.75-43.64        | 60.78        | 56.36-64.25        | 496.21        | 191.00        | 114.21        | 3.22                          | 0.07                       |
|                                                                  | E                    |              |                    |              |                    | 100          | 100-100            | 511.93        | 192.00        | 127.93        | 18.94                         | 0.00                       |
| <b>Calcified plaque volume - log transformed data</b>            |                      |              |                    |              |                    |              |                    |               |               |               |                               |                            |
| Age Sex                                                          | ACE                  | 73.75        | 58.12-86.92        | 17.06        | 2.67-33.27         | 9.18         | 7.45-10.29         | 351.62        | 190.00        | -28.38        |                               |                            |
|                                                                  | <b>AE</b>            | <b>90.72</b> | <b>89.64-92.41</b> |              |                    | <b>9.28</b>  | <b>7.59-10.36</b>  | <b>352.26</b> | <b>191.00</b> | <b>-29.74</b> | <b>0.64</b>                   | <b>0.42</b>                |
|                                                                  | CE                   |              |                    | 74.73        | 71.07-78.80        | 25.27        | 21.2-28.93         | 383.46        | 191.00        | 1.46          | 31.84                         | 0.00                       |
|                                                                  | E                    |              |                    |              |                    | 100          | 100-100            | 463.58        | 192.00        | 79.58         | 111.97                        | 0.00                       |
| ASCVD§ Statin Risk                                               | ACE                  | <b>56.56</b> | <b>43.60-72.48</b> | <b>34.51</b> | <b>19.06-47.01</b> | <b>8.94</b>  | <b>7.74-10.94</b>  | <b>377.24</b> | <b>190.00</b> | <b>-2.76</b>  |                               |                            |
|                                                                  | AE                   | 90.68        | 88.9-92.09         |              |                    | 9.32         | 7.91-11.1          | 379.92        | 191.00        | -2.08         | 2.68                          | 0.10                       |
|                                                                  | CE                   |              |                    | 77.34        | 73.04-80.71        | 22.66        | 19.29-26.96        | 399.86        | 191.00        | 17.86         | 22.63                         | 0.00                       |
|                                                                  | E                    |              |                    |              |                    | 100          | 100-100            | 479.24        | 192.00        | 95.24         | 102.00                        | 0.00                       |
| <b>Calcified plaque volume - inverse normal transformed data</b> |                      |              |                    |              |                    |              |                    |               |               |               |                               |                            |
| Age Sex                                                          | ACE                  | 62.93        | 44.56-75.56        | 16.17        | 0.00-35.40         | 20.90        | 15.63-22.31        | 490.24        | 190.00        | 110.24        |                               |                            |
|                                                                  | <b>AE</b>            | <b>79.29</b> | <b>77.8-84.15</b>  |              |                    | <b>20.71</b> | <b>15.85-22.2</b>  | <b>490.72</b> | <b>191.00</b> | <b>108.72</b> | <b>0.49</b>                   | <b>0.49</b>                |
|                                                                  | CE                   |              |                    | 65.12        | 61.60-70.79        | 34.88        | 29.21-38.4         | 501.09        | 191.00        | 119.09        | 10.86                         | 0.00                       |
|                                                                  | E                    |              |                    |              |                    | 100          | 100-100            | 555.16        | 192.00        | 171.16        | 64.92                         | 0.00                       |
| ASCVD§ Statin Risk                                               | ACE                  | 56.16        | 39.21-72.26        |              |                    | 21.07        | 4.04-38.04         | 485.91        | 190.00        | 105.91        |                               |                            |
|                                                                  | <b>AE</b>            | <b>77.60</b> | <b>73.22-80.29</b> |              |                    | <b>22.40</b> | <b>19.71-26.78</b> | <b>486.73</b> | <b>191.00</b> | <b>104.73</b> | <b>0.82</b>                   | <b>0.37</b>                |
|                                                                  | CE                   |              |                    | 64.26        | 58.56-68.05        | 35.74        | 31.95-41.44        | 493.91        | 191.00        | 111.91        | 8.00                          | 0.00                       |
|                                                                  | E                    |              |                    |              |                    | 100          | 100-100            | 543.95        | 192.00        | 159.95        | 58.04                         | 0.00                       |

\*A: additive genetic factor, †C: common environmental factor, ‡E: unique environmental factor, §ASCVD: Atherosclerotic Cardiovascular Disease

**Table S4: Detailed model information regarding single trait classical twin model of calcified plaque volume excluding the 0-0 pairs (n = 124). The most parsimonious models are bolded.**

| Adjusted for                                                     | Estimated parameters | A*           | 95% CI             | C†    | 95% CI      | ‡E           | 95% CI             | Model -2LL    | df            | AIC           | Difference to full model -2LL | Difference to full model p |
|------------------------------------------------------------------|----------------------|--------------|--------------------|-------|-------------|--------------|--------------------|---------------|---------------|---------------|-------------------------------|----------------------------|
| <b>Calcified plaque volume - raw data</b>                        |                      |              |                    |       |             |              |                    |               |               |               |                               |                            |
| Age Sex                                                          | ACE                  | 55.49        | 50.25-76.38        |       |             | 44.51        | 25.04-49.30        | 319.92        | 118.00        | 83.92         |                               |                            |
|                                                                  | <b>AE</b>            | <b>55.49</b> | <b>50.45-72.64</b> |       |             | <b>44.51</b> | <b>27.36-49.55</b> | <b>319.92</b> | <b>119.00</b> | <b>81.92</b>  | <b>0.00</b>                   | <b>1.00</b>                |
|                                                                  | CE                   |              |                    | 37.29 | 33.67-43.37 | 62.71        | 56.63-66.33        | 322.83        | 119.00        | 84.83         | 2.92                          | 0.09                       |
|                                                                  | E                    |              |                    |       |             | 100          | 100-100            | 332.11        | 120.00        | 92.11         | 12.20                         | 0.00                       |
| ASCVD§ Statin Risk                                               | ACE                  | 52.69        | 39.68-71.91        | 0.00  | 0.00-28.00  | 47.30        | 30.42-55.47        | 323.30        | 118.00        | 87.30         |                               |                            |
|                                                                  | <b>AE</b>            | <b>52.69</b> | <b>43.16-66.67</b> |       |             | <b>47.31</b> | <b>33.33-56.84</b> | <b>323.30</b> | <b>119.00</b> | <b>85.30</b>  | <b>0.00</b>                   | <b>1.00</b>                |
|                                                                  | CE                   |              |                    | 36.74 | 33.04-40.13 | 63.26        | 59.87-66.96        | 325.08        | 119.00        | 87.08         | 1.78                          | 0.18                       |
|                                                                  | E                    |              |                    |       |             | 100          | 100-100            | 333.77        | 120.00        | 93.77         | 10.47                         | 0.01                       |
| <b>Calcified plaque volume - log transformed data</b>            |                      |              |                    |       |             |              |                    |               |               |               |                               |                            |
| Age Sex                                                          | ACE                  | 78.68        | 76.20-82.94        | 0.00  | 0.00-40.76  | 21.32        | 17.2-23.83         | 286.02        | 118.00        | 50.02         |                               |                            |
|                                                                  | <b>AE</b>            | <b>78.68</b> | <b>76.28-83.19</b> |       |             | <b>21.32</b> | <b>16.81-23.72</b> | <b>286.02</b> | <b>119.00</b> | <b>48.02</b>  | <b>0.00</b>                   | <b>1.00</b>                |
|                                                                  | CE                   |              |                    | 46.62 | 40.18-54.86 | 53.38        | 45.14-59.82        | 300.46        | 119.00        | 62.46         | 14.43                         | 0.00                       |
|                                                                  | E                    |              |                    |       |             | 100          | 100-100            | 315.65        | 120.00        | 75.65         | 29.63                         | 0.00                       |
| ASCVD§ Statin Risk                                               | ACE                  | 80.77        | 78.25-84.71        |       |             | 19.23        | 15.83-22.17        | 294.07        | 118.00        | 58.07         |                               |                            |
|                                                                  | <b>AE</b>            | <b>80.77</b> | <b>77.26-83.21</b> |       |             | <b>19.23</b> | <b>16.79-22.74</b> | <b>294.07</b> | <b>119.00</b> | <b>56.07</b>  | <b>0.00</b>                   | <b>1.00</b>                |
|                                                                  | CE                   |              |                    | 54.69 | 49.00-61.48 | 45.31        | 38.52-51.00        | 309.04        | 119.00        | 71.04         | 14.97                         | 0.00                       |
|                                                                  | E                    |              |                    |       |             | 100          | 100-100            | 330.56        | 120.00        | 90.56         | 36.48                         | 0.00                       |
| <b>Calcified plaque volume - inverse normal transformed data</b> |                      |              |                    |       |             |              |                    |               |               |               |                               |                            |
| Age Sex                                                          | ACE                  | 47.17        | 44.71-57.96        |       |             | 52.83        | 42.04-55.34        | 341.96        | 118.00        | 105.96        |                               |                            |
|                                                                  | <b>AE</b>            | <b>47.17</b> | <b>43.81-55.85</b> |       |             | <b>52.83</b> | <b>44.15-56.19</b> | <b>341.96</b> | <b>119.00</b> | <b>103.96</b> | <b>0.00</b>                   | <b>1.00</b>                |
|                                                                  | CE                   |              |                    | 26.69 | 22.96-36.17 | 73.31        | 63.83-77.04        | 346.23        | 119.00        | 108.23        | 4.27                          | 0.04                       |
|                                                                  | E                    |              |                    |       |             | 100          | 100-100            | 350.81        | 120.00        | 110.81        | 8.85                          | 0.01                       |
| ASCVD§ Statin Risk                                               | ACE                  | 47.82        | 41.25-54.91        | 0.00  | 0.00-50.07  | 52.18        | 45.43-58.94        | 340.68        | 118.00        | 104.68        |                               |                            |
|                                                                  | <b>AE</b>            | <b>47.82</b> | <b>41.24-54.83</b> |       |             | <b>52.18</b> | <b>44.17-58.76</b> | <b>340.68</b> | <b>119.00</b> | <b>102.68</b> | <b>0.00</b>                   | <b>1.00</b>                |
|                                                                  | CE                   |              |                    | 28.65 | 22.62-36.80 | 71.35        | 63.20-77.38        | 344.81        | 119.00        | 106.81        | 4.13                          | 0.04                       |
|                                                                  | E                    |              |                    |       |             | 100          | 100-100            | 349.99        | 120.00        | 109.99        | 9.31                          | 0.01                       |

\*A: additive genetic factor, †C: common environmental factor, ‡E: unique environmental factor, §ASCVD: Atherosclerotic Cardiovascular Disease

**Table S5: Detailed model information regarding single trait classical twin model of non-calcified plaque volume (n = 196). The most parsimonious models are bolded.**

| Adjusted for                                                         | Estimated parameters | A*           | 95% CI             | C†           | 95% CI             | ‡E           | 95% CI             | Model -2LL    | df            | AIC           | Difference to full model -2LL | Difference to full model p |
|----------------------------------------------------------------------|----------------------|--------------|--------------------|--------------|--------------------|--------------|--------------------|---------------|---------------|---------------|-------------------------------|----------------------------|
| <b>Non-calcified plaque volume - raw data</b>                        |                      |              |                    |              |                    |              |                    |               |               |               |                               |                            |
| Age Sex                                                              | ACE                  | 77.03        | 72.70-86.95        |              |                    | 22.97        | 16.22-27.6         | 444.20        | 190.00        | 64.20         |                               |                            |
|                                                                      | <b>AE</b>            | <b>77.03</b> | <b>72.31-83.69</b> |              |                    | <b>22.97</b> | <b>16.31-27.69</b> | <b>444.20</b> | <b>191.00</b> | <b>62.20</b>  | <b>0.00</b>                   | <b>1.00</b>                |
|                                                                      | CE                   |              |                    | 55.06        | 43.51-60.90        | 44.94        | 39.10-56.49        | 461.73        | 191.00        | 79.73         | 17.53                         | 0.00                       |
|                                                                      | E                    |              |                    |              |                    | 100          | 100-100            | 497.13        | 192.00        | 113.13        | 52.93                         | 0.00                       |
| ASCVD§ Statin Risk                                                   | ACE                  | 77.44        | 70.91-83.89        |              |                    | 22.56        | 16.11-29.09        | 461.15        | 190.00        | 81.15         |                               |                            |
|                                                                      | <b>AE</b>            | <b>77.44</b> | <b>69.14-83.39</b> |              |                    | <b>22.56</b> | <b>16.61-30.86</b> | <b>461.15</b> | <b>191.00</b> | <b>79.15</b>  | <b>0.00</b>                   | <b>1.00</b>                |
|                                                                      | CE                   |              |                    | 55.02        | 43.90-65.48        | 44.98        | 34.52-56.10        | 476.48        | 191.00        | 94.48         | 15.34                         | 0.00                       |
|                                                                      | E                    |              |                    |              |                    | 100          | 100-100            | 507.47        | 192.00        | 123.47        | 46.32                         | 0.00                       |
| <b>Non-calcified plaque volume - log transformed data</b>            |                      |              |                    |              |                    |              |                    |               |               |               |                               |                            |
| Age Sex                                                              | ACE                  | 11.77        | 3.66-17.56         | 82.54        | 76.45-90.09        | 5.7          | 4.64-7.02          | 259.27        | 190.00        | -120.73       |                               |                            |
|                                                                      | AE                   | 93.81        | 91.17-94.8         |              |                    | 6.19         | 5.20-7.83          | 288.64        | 191.00        | -93.36        | 29.36                         | 0.00                       |
|                                                                      | CE                   |              |                    | 91.97        | 90.45-93.79        | 8.03         | 6.21-9.55          | 265.36        | 191.00        | -116.64       | 6.09                          | 0.01                       |
|                                                                      | E                    |              |                    |              |                    | 100          | 100-100            | 448.65        | 192.00        | 64.65         | 189.37                        | 0.00                       |
| ASCVD§ Statin Risk                                                   | ACE                  | 7.47         | 3.94-13.34         | 88.68        | 82.58-91.75        | 3.85         | 3.25-4.90          | 297.67        | 190.00        | -82.33        |                               |                            |
|                                                                      | AE                   | 95.10        | 93.74-95.91        |              |                    | 4.9          | 4.09-6.26          | 337.37        | 191.00        | -44.63        | 39.70                         | 0.00                       |
|                                                                      | CE                   |              |                    | 94.61        | 93.25-95.6         | 5.39         | 4.4-6.75           | 303.15        | 191.00        | -78.85        | 5.48                          | 0.02                       |
|                                                                      | E                    |              |                    |              |                    | 100          | 100-100            | 479.41        | 192.00        | 95.41         | 181.74                        | 0.00                       |
| <b>Non-calcified plaque volume - inverse normal transformed data</b> |                      |              |                    |              |                    |              |                    |               |               |               |                               |                            |
| Age Sex                                                              | ACE                  | 21.42        | 0.00-37.22         | 45.33        | 36.02-60.14        | 33.25        | 27.89-40.51        | 506.48        | 190.00        | 126.48        |                               |                            |
|                                                                      | AE                   | 68.57        | 62.39-74.76        |              |                    | 31.43        | 25.54-37.61        | 510.11        | 191.00        | 128.11        | 3.62                          | 0.06                       |
|                                                                      | <b>CE</b>            |              |                    | <b>62.07</b> | <b>57.63-68.13</b> | <b>37.93</b> | <b>31.87-42.37</b> | <b>507.48</b> | <b>191.00</b> | <b>125.48</b> | <b>1.00</b>                   | <b>0.32</b>                |
|                                                                      | E                    |              |                    |              |                    | 100          | 100-100            | 555.17        | 192.00        | 171.17        | 48.69                         | 0.00                       |
| ASCVD§ Statin Risk                                                   | ACE                  | 16.07        | 0.00-37.91         | 50.09        | 35.59-59.44        | 33.84        | 29.34-42.45        | 503.03        | 190.00        | 123.03        |                               |                            |
|                                                                      | AE                   | 67.91        | 59.97-73.62        |              |                    | 32.09        | 26.38-40.03        | 507.52        | 191.00        | 125.52        | 4.49                          | 0.03                       |
|                                                                      | <b>CE</b>            |              |                    | <b>62.56</b> | <b>55.67-66.70</b> | <b>37.44</b> | <b>33.30-44.33</b> | <b>503.60</b> | <b>191.00</b> | <b>121.60</b> | <b>0.57</b>                   | <b>0.45</b>                |
|                                                                      | E                    |              |                    |              |                    | 100          | 100-100            | 548.02        | 192.00        | 164.02        | 44.99                         | 0.00                       |

\*A: additive genetic factor, †C: common environmental factor, ‡E: unique environmental factor, §ASCVD: Atherosclerotic Cardiovascular Disease



**Table S6: Detailed model information regarding single trait classical twin model of non-calcified plaque volume excluding the 0-0 pairs (n = 124). The most parsimonious models are bolded.**

| Adjusted for                                                         | Estimated parameters | A*           | 95% CI             | C†    | 95% CI      | ‡E           | 95% CI             | Model -2LL    | df            | AIC           | Difference to full model -2LL | Difference to full model p |
|----------------------------------------------------------------------|----------------------|--------------|--------------------|-------|-------------|--------------|--------------------|---------------|---------------|---------------|-------------------------------|----------------------------|
| <b>Non-calcified plaque volume - raw data</b>                        |                      |              |                    |       |             |              |                    |               |               |               |                               |                            |
| Age Sex                                                              | ACE                  | 70.40        | 65.20-84.06        | 0.00  | 0.00-67.67  | 29.60        | 21.27-38.05        | 299.11        | 118.00        | 63.11         |                               |                            |
|                                                                      | <b>AE</b>            | <b>70.40</b> | <b>62.92-78.42</b> |       |             | <b>29.60</b> | <b>21.58-37.08</b> | <b>299.11</b> | <b>119.00</b> | <b>61.11</b>  | <b>0.00</b>                   | <b>1.00</b>                |
|                                                                      | CE                   |              |                    | 46.89 | 33.74-56.64 | 53.11        | 43.36-66.26        | 307.97        | 119.00        | 69.97         | 8.87                          | 0.00                       |
|                                                                      | E                    |              |                    |       |             | 100          | 100-100            | 323.37        | 120.00        | 83.37         | 24.26                         | 0.00                       |
| ASCVD§ Statin Risk                                                   | ACE                  | 73.48        | 61.99-85.69        | 0.00  | 0.00-66.46  | 26.52        | 19.33-35.40        | 309.30        | 118.00        | 73.30         |                               |                            |
|                                                                      | <b>AE</b>            | <b>73.48</b> | <b>64.60-80.05</b> |       |             | <b>26.52</b> | <b>19.95-35.40</b> | <b>309.30</b> | <b>119.00</b> | <b>71.30</b>  | <b>0.00</b>                   | <b>1.00</b>                |
|                                                                      | CE                   |              |                    | 51.24 | 38.91-61.50 | 48.76        | 38.50-61.08        | 317.76        | 119.00        | 79.76         | 8.46                          | 0.00                       |
|                                                                      | E                    |              |                    |       |             | 100          | 100-100            | 335.03        | 120.00        | 95.03         | 25.73                         | 0.00                       |
| <b>Non-calcified plaque volume - log transformed data</b>            |                      |              |                    |       |             |              |                    |               |               |               |                               |                            |
| Age Sex                                                              | ACE                  | 61.90        | 54.09-74.57        | 2.25  | 0.00-44.05  | 35.85        | 29.00-44.14        | 286.50        | 118.00        | 50.50         |                               |                            |
|                                                                      | <b>AE</b>            | <b>64.24</b> | <b>55.62-71.34</b> |       |             | <b>35.76</b> | <b>28.66-44.38</b> | <b>286.50</b> | <b>119.00</b> | <b>48.50</b>  | <b>0.00</b>                   | <b>0.95</b>                |
|                                                                      | CE                   |              |                    | 51.87 | 45.12-60.69 | 48.13        | 39.31-54.88        | 289.73        | 119.00        | 51.73         | 3.23                          | 0.07                       |
|                                                                      | E                    |              |                    |       |             | 100          | 100-100            | 309.16        | 120.00        | 69.16         | 22.66                         | 0.00                       |
| ASCVD§ Statin Risk                                                   | ACE                  | 43.70        | 20.41-68.13        | 25.84 | 0.00-49.70  | 30.46        | 25.05-36.96        | 296.83        | 118.00        | 60.83         |                               |                            |
|                                                                      | <b>AE</b>            | <b>70.36</b> | <b>64.67-75.78</b> |       |             | <b>29.64</b> | <b>24.22-35.33</b> | <b>297.52</b> | <b>119.00</b> | <b>59.52</b>  | <b>0.69</b>                   | <b>0.41</b>                |
|                                                                      | CE                   |              |                    | 59.68 | 52.91-66.19 | 40.32        | 33.81-47.09        | 299.20        | 119.00        | 61.20         | 2.37                          | 0.12                       |
|                                                                      | E                    |              |                    |       |             | 100          | 100-100            | 325.45        | 120.00        | 85.45         | 28.62                         | 0.00                       |
| <b>Non-calcified plaque volume - inverse normal transformed data</b> |                      |              |                    |       |             |              |                    |               |               |               |                               |                            |
| Age Sex                                                              | ACE                  | 51.76        | 35.53-54.07        | 0.00  | 0.00-33.82  | 58.24        | 47.19-64.86        | 343.55        | 118.00        | 107.55        |                               |                            |
|                                                                      | <b>AE</b>            | <b>41.76</b> | <b>35.01-51.97</b> |       |             | <b>58.24</b> | <b>48.03-64.99</b> | <b>343.55</b> | <b>119.00</b> | <b>105.55</b> | <b>0.00</b>                   | <b>1.00</b>                |
|                                                                      | CE                   |              |                    | 29.45 | 24.93-38.58 | 70.55        | 61.42-75.07        | 345.26        | 119.00        | 107.26        | 1.71                          | 0.19                       |
|                                                                      | E                    |              |                    |       |             | 100          | 100-100            | 350.89        | 120.00        | 110.89        | 7.34                          | 0.03                       |
| ASCVD§ Statin Risk                                                   | ACE                  | 44.99        | 40.53-59.68        |       |             | 55.01        | 46.15-52.78        | 341.19        | 118.00        | 105.19        |                               |                            |
|                                                                      | <b>AE</b>            | <b>44.99</b> | <b>35.65-52.27</b> |       |             | <b>55.01</b> | <b>47.73-64.35</b> | <b>341.19</b> | <b>119.00</b> | <b>103.19</b> | <b>0.00</b>                   | <b>1.00</b>                |
|                                                                      | CE                   |              |                    | 32.49 | 25.13-39.51 | 67.51        | 60.49-74.87        | 342.88        | 119.00        | 104.88        | 1.68                          | 0.19                       |
|                                                                      | E                    |              |                    |       |             | 100          | 100-100            | 349.53        | 120.00        | 109.53        | 8.34                          | 0.02                       |

\*A: additive genetic factor, †C: common environmental factor, ‡E: unique environmental factor, §ASCVD: Atherosclerotic Cardiovascular Disease
